# Supplementary material for: SuperFreq: Integrated mutation detection and clonal tracking in cancer
Source: PubMed Central journal article supplement (PMC7043783; doi:10.1371/journal.pcbi.1007603), 2020-02-13
Supplement: pcbi.1007603.s010.pdf [file pcbi.1007603.s010.pdf]

|         | truth | TP  | FN <sub>P</sub> | FP  | TP <sub>g</sub> | FP <sub>g</sub> | FP <sub>gP</sub> |
|---------|-------|-----|-----------------|-----|-----------------|-----------------|------------------|
| AML.080 | 296   | 273 | 23/23           | 230 | 271             | 58              | 30               |
| AML.084 | 10    | 8   | 2/2             | 263 | 5               | 88              | 55               |
| AML.102 | 9     | 7   | 2/2             | 216 | 3               | 76              | 47               |
| AML.110 | 13    | 12  | 1/1             | 193 | 5               | 48              | 26               |
