# Supplementary material for: SuperFreq: Integrated mutation detection and clonal tracking in cancer
Source: PubMed Central journal article supplement (PMC7043783; doi:10.1371/journal.pcbi.1007603), 2020-02-13
Supplement: pcbi.1007603.s011.pdf [file pcbi.1007603.s011.pdf]

| AML.084    | Recall | FN in dbSNP | FP | runtime |
|------------|--------|-------------|----|---------|
| 10 normals | 69/69  | 0/0         | 0  | 150m    |
| 5 normals  | 65/69  | 3/4         | 12 | 129m    |
| 3 normals  | 63/69  | 5/6         | 12 | 119m    |
| 2 normals  | 66/69  | 2/3         | 21 | 106m    |
